# Supplementary material
Source: publisher figshare collection journal article supplement (https://gsapubs.figshare.com/ndownloader/files/35295724)
Supplement: Supplementary file 1 [file 35295724]

| TABLE S1. 238U/206Pb AND 207Pb/206Pb RATIOS AND UNCERTAINTIES AS 2 STANDARD ERRORS (2 SE) MEASURED BY LA-ICP-MS | | | | |
| --- | --- | --- | --- | --- |
| Analysis number | 238U/206Pb | 2 SE | 207Pb/206Pb | 2 SE |
| Sample P1 | | | | |
| 1 | 0.489 | 0.014 | 0.8058 | 0.0094 |
| 2 | 0.085 | 0.003 | 0.831 | 0.009 |
| 3 | 0.175 | 0.008 | 0.823 | 0.016 |
| 4 | 0.346 | 0.010 | 0.814 | 0.011 |
| 5 | 0.242 | 0.009 | 0.826 | 0.014 |
| 6 | 0.194 | 0.006 | 0.8232 | 0.0083 |
| 7 | 0.526 | 0.013 | 0.8175 | 0.0059 |
| 8 | 0.292 | 0.009 | 0.8183 | 0.0088 |
| 9 | 0.488 | 0.012 | 0.817 | 0.007 |
| 10 | 2.28 | 0.062 | 0.7509 | 0.0056 |
| 11 | 0.040 | 0.002 | 0.8238 | 0.0077 |
| 12 | 0.740 | 0.020 | 0.81 | 0.01 |
| 13 | 0.388 | 0.011 | 0.825 | 0.009 |
| 14 | 0.317 | 0.009 | 0.817 | 0.009 |
| 15 | 0.189 | 0.005 | 0.8224 | 0.0074 |
| 16 | 0.686 | 0.020 | 0.814 | 0.013 |
| 17 | 0.176 | 0.006 | 0.819 | 0.008 |
| 18 | 0.471 | 0.013 | 0.8148 | 0.0081 |
| 19 | 0.424 | 0.012 | 0.8183 | 0.0099 |
| 20 | 0.531 | 0.017 | 0.816 | 0.015 |
| 21 | 0.062 | 0.003 | 0.832 | 0.012 |
| 22 | 0.139 | 0.006 | 0.824 | 0.009 |
| 23 | 0.429 | 0.012 | 0.822 | 0.01 |
| 24 | 0.107 | 0.005 | 0.822 | 0.013 |
| 25 | 0.039 | 0.002 | 0.828 | 0.011 |
| 26 | 0.540 | 0.013 | 0.8139 | 0.0045 |
| 27 | 0.554 | 0.019 | 0.821 | 0.014 |
| 28 | 0.472 | 0.013 | 0.826 | 0.01 |
| 29 | 0.203 | 0.006 | 0.826 | 0.008 |
| 30 | 2.32 | 0.97 | 0.748 | 0.011 |
| 31 | 0.201 | 0.006 | 0.8146 | 0.0081 |
| 32 | 0.929 | 0.025 | 0.7912 | 0.0047 |
| 33 | 0.352 | 0.010 | 0.8075 | 0.0068 |
| 34 | 0.405 | 0.015 | 0.8112 | 0.0083 |
| 35 | 0.290 | 0.008 | 0.8087 | 0.0068 |
| 36 | 0.293 | 0.009 | 0.816 | 0.012 |
| Sample P2 | | | | |
| 1 | 0.229 | 0.008 | 0.8265 | 0.0036 |
| 2 | 0.102 | 0.003 | 0.8293 | 0.0068 |
| 3 | 0.191 | 0.008 | 0.8216 | 0.0062 |
| 4 | 0.130 | 0.004 | 0.8264 | 0.0081 |
| 5 | 0.106 | 0.006 | 0.8319 | 0.0083 |
| 6 | 0.100 | 0.003 | 0.8338 | 0.0073 |
| 7 | 0.189 | 0.004 | 0.8176 | 0.0069 |
| 8 | 0.861 | 0.014 | 0.7972 | 0.0043 |
| 9 | 0.198 | 0.005 | 0.835 | 0.013 |
| 10 | 0.209 | 0.006 | 0.8175 | 0.0083 |
| 11 | 1.25 | 0.04 | 0.79 | 0.01 |
| 12 | 0.132 | 0.004 | 0.822 | 0.011 |
| 13 | 0.069 | 0.003 | 0.8235 | 0.0072 |
| 14 | 0.344 | 0.007 | 0.8174 | 0.0066 |
| 15 | 0.534 | 0.021 | 0.80 | 0.01 |
| 16 | 0.165 | 0.004 | 0.8238 | 0.0066 |
| 17 | 0.862 | 0.022 | 0.7947 | 0.0097 |
| 18 | 1.11 | 0.025 | 0.7924 | 0.0083 |
| 19 | 0.360 | 0.009 | 0.8173 | 0.0067 |
| 20 | 0.506 | 0.010 | 0.8128 | 0.0089 |
| 21 | 0.252 | 0.005 | 0.8216 | 0.0067 |
| 22 | 0.266 | 0.010 | 0.8196 | 0.0072 |
| 23 | 0.184 | 0.004 | 0.8345 | 0.0071 |
| 24 | 1.40 | 0.03 | 0.798 | 0.011 |
| Sample P3 | | | | |
| 1 | 0.552 | 0.014 | 0.8124 | 0.0063 |
| 2 | 0.266 | 0.007 | 0.8181 | 0.0047 |
| 3 | 0.450 | 0.012 | 0.8166 | 0.0064 |
| 4 | 0.071 | 0.002 | 0.8336 | 0.0044 |
| 5 | 0.809 | 0.022 | 0.7974 | 0.0082 |
| 6 | 0.742 | 0.021 | 0.7995 | 0.0063 |
| 7 | 1.96 | 0.05 | 0.7613 | 0.0042 |
| 8 | 3.52 | 0.10 | 0.7208 | 0.0049 |
| 9 | 0.585 | 0.015 | 0.8179 | 0.0079 |
| 10 | 0.134 | 0.004 | 0.8277 | 0.004 |
| 11 | 2.54 | 0.10 | 0.7421 | 0.0055 |
| 12 | 1.06 | 0.03 | 0.796 | 0.004 |
| 13 | 0.096 | 0.003 | 0.8304 | 0.0043 |
| 14 | 0.081 | 0.002 | 0.8329 | 0.0048 |
| 15 | 0.100 | 0.003 | 0.827 | 0.005 |
| 16 | 0.105 | 0.003 | 0.8303 | 0.0044 |
| 17 | 0.815 | 0.020 | 0.8053 | 0.0045 |
